# Supplementary material
Source: publisher figshare collection journal article supplement (https://springernature.figshare.com/ndownloader/files/13149833)

Funnel plot

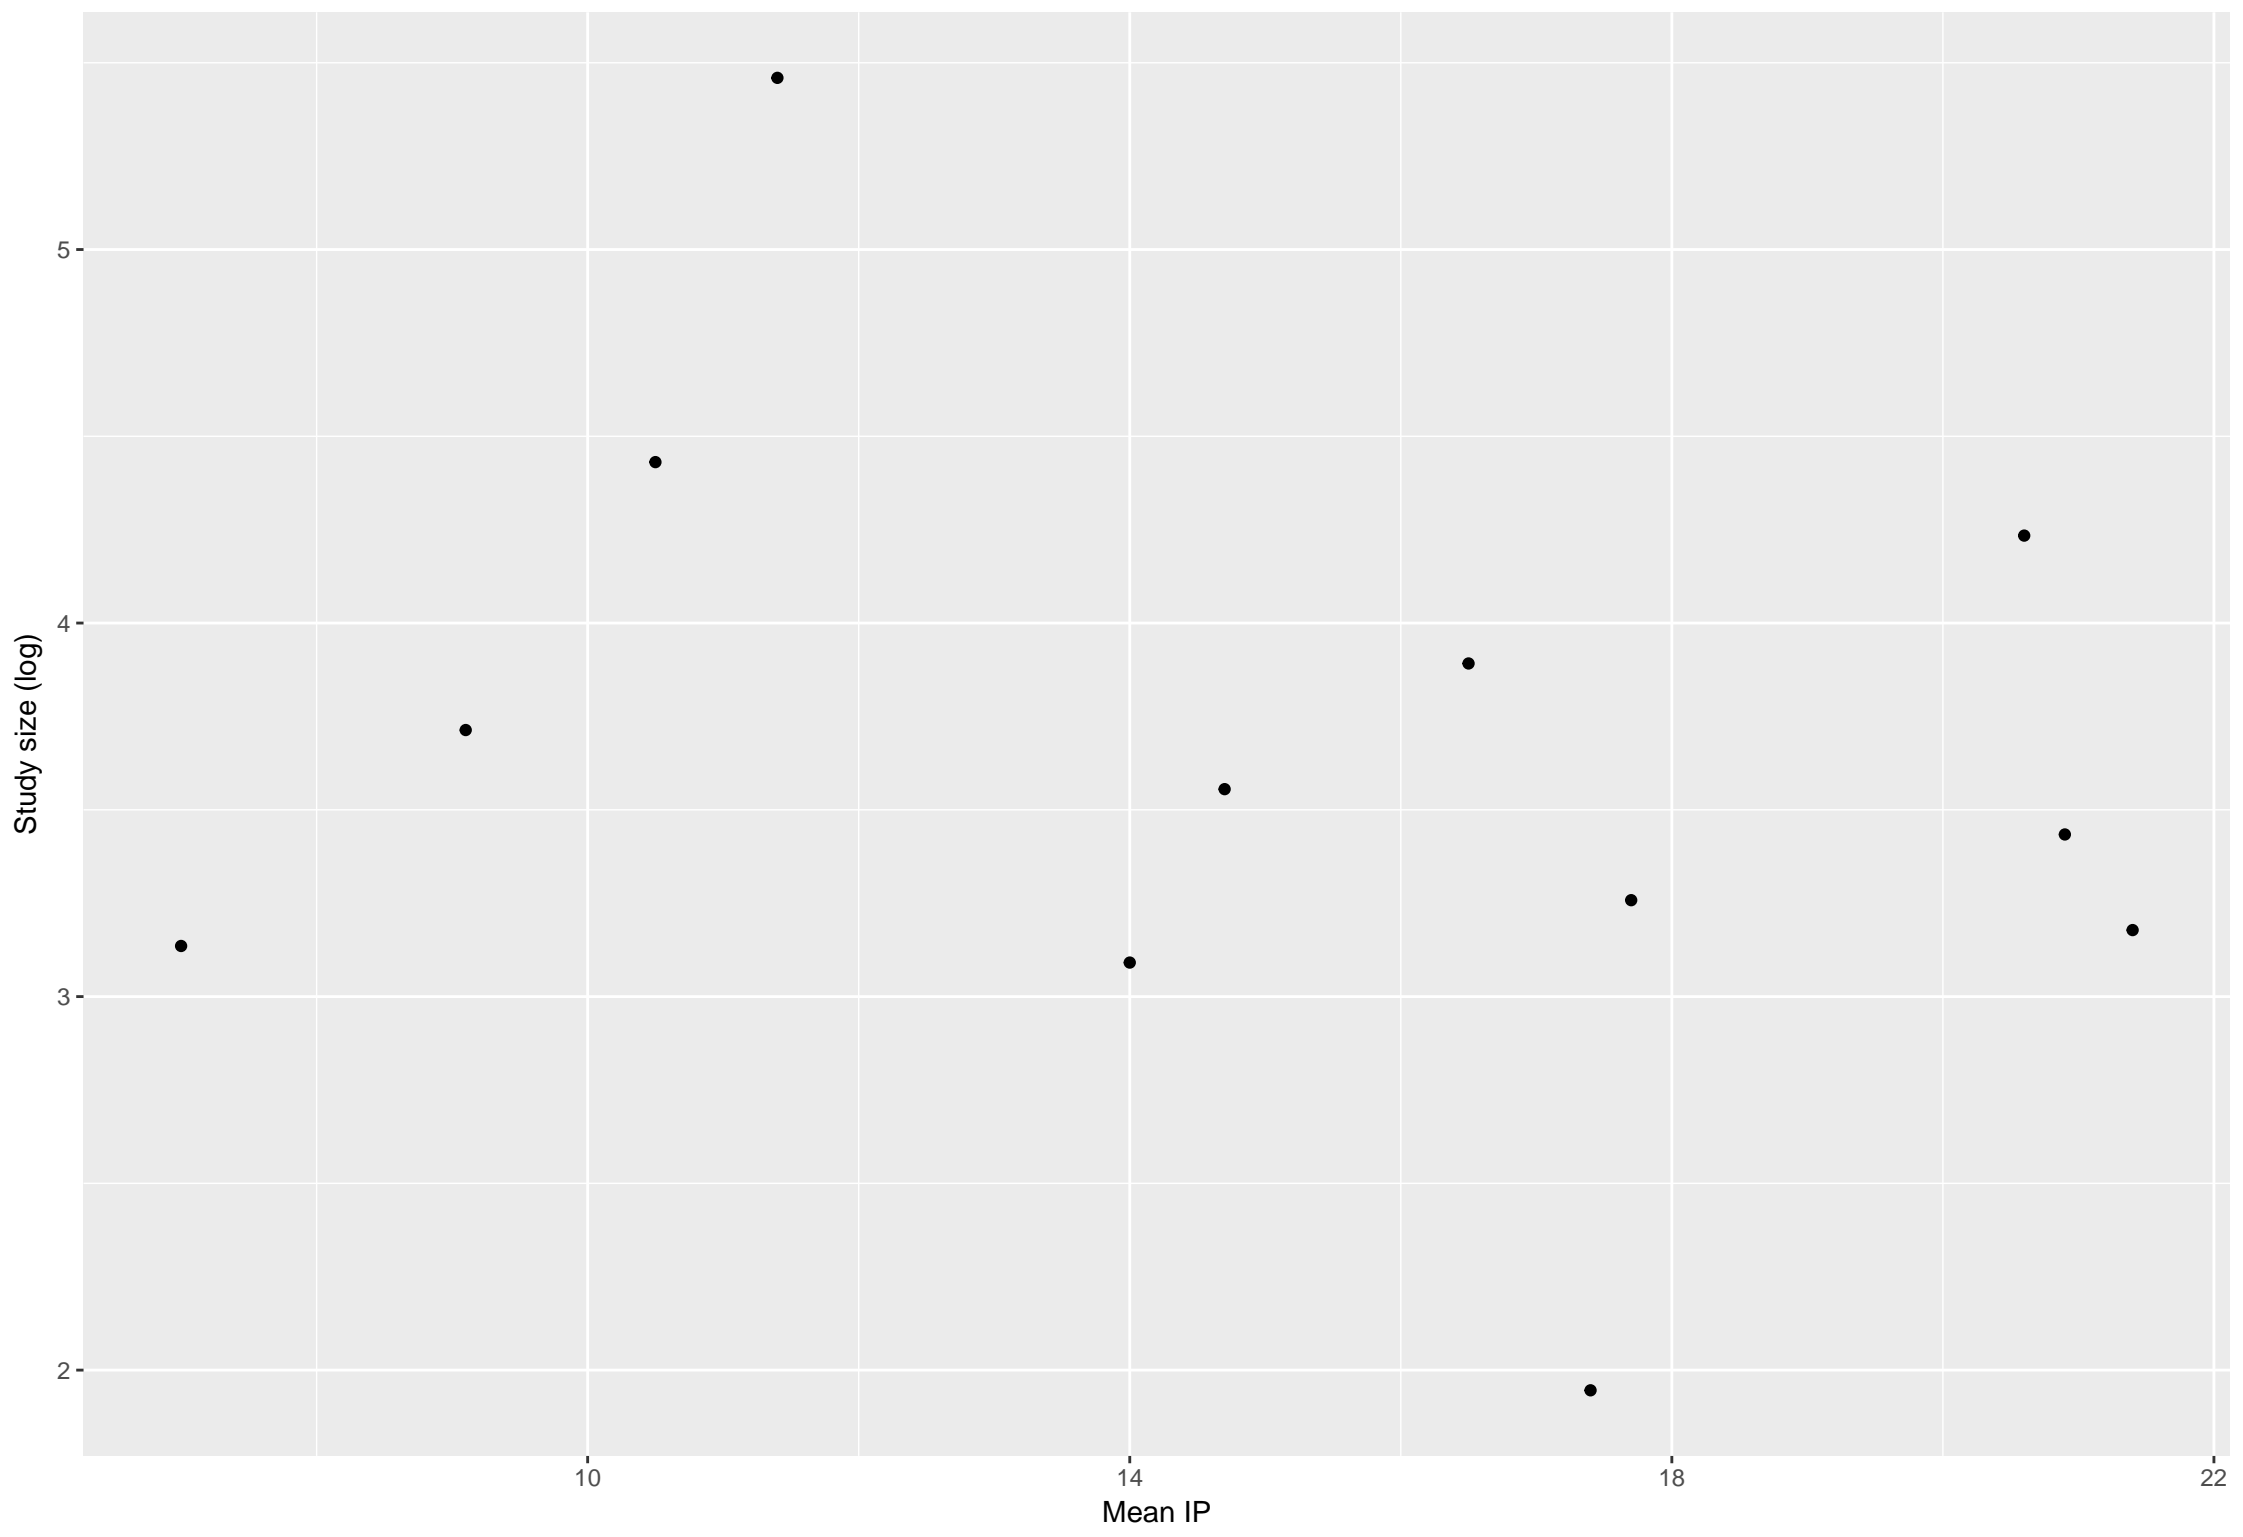

Supplement: Supplementary file [file 13149833]
